# Supplementary material for: Developmental Origin of Patchy Axonal Connectivity in the Neocortex: A Computational Model
Source: PubMed Central journal article supplement — Cereb Cortex. 2012 Nov 6;24(2):487–500. doi: 10.1093/cercor/bhs327 (PMC3888370; doi:10.1093/cercor/bhs327), 2012-11-06
Supplement: supp_bhs327_bhs327supp_script3.pdf [file supp_bhs327_bhs327supp_script3.pdf]

## PhysicalNode.java

```
/**
 * Degrade (according to degrad. constant) and diffuse according to diff. constant)
 * all the <code>Substance</code> stored in this <code>PhysicalNode</code>.
 */
public void runExtracellularDiffusion(){
    // 1) now that we are about to diffuse, a new diffusion should only be performed
    // if there is a good reason for that.
    onTheSchedulerListForPhysicalNodes = false;
    double currentEcmTime = ecm.getECMtime();
    // 2) Degradation according to the degradation constant for each chemical
    degrade(currentEcmTime);
    // 3) Diffusion (along every edge)
    for (SpatialOrganizationEdge<PhysicalNode> e : soNode.getEdges()) {
        diffuseEdgeAnalytically(e, currentEcmTime);
    }
}

/**
 * Runs the degradation of all Substances (only if it is not up-to-date). This method
 * is called before each operation on Substances (
 * @param currentEcmTime the current time of the caller
 * (so that it doesn't require a call to ECM).
 */
protected void degrade(double currentEcmTime){ //changed to protected

    // if we are up-to-date : we stop here.
    if(lastECMTimeDegradeWasRun > currentEcmTime){
        return;
    }

    //getRwLock().writeLock().lock();
    // Otherwise, degradation according to the degradation constant for each chemical
    double deltaT = currentEcmTime-lastECMTimeDegradeWasRun;
    for (Substance s : extracellularSubstances.values()) {
        double decay = Math.exp(-s.getDegradationConstant()*deltaT);
        s.multiplyQuantityAndConcentrationBy(decay);
    }

    // We store the current time as the last time we updated degradation
    // (+0.0000001, to be on the safe side of the double comparison)
    lastECMTimeDegradeWasRun= currentEcmTime+0.0000001;
    //
}

/* Analytic solution of the diffusion process along the edge between two PhysicalNodes.
 *  $dQA/dt = diffCst*(Area/distance)*(QB/VB-QA/VA)$ 
 */
```

```

*/
private void diffuseEdgeAnalytically(SpatialOrganizationEdge<PhysicalNode> e, double
currentEcmTime) {

    // the two PhysicalNodes
    PhysicalNode nA = this;
    PhysicalNode nB = e.getOppositeElement(this);

    // make sure the other one is up-to-date with degradation
    nB.degrade(currentEcmTime);
    // some values about space node distances, contact area and volume
    SpatialOrganizationNode<PhysicalNode> sonA = getSoNode();
    SpatialOrganizationNode<PhysicalNode> sonB = nB.getSoNode();
    double distance = distance(sonA.getPosition(), sonB.getPosition());
    double vA = sonA.getVolume();
    double vB = sonB.getVolume();
    double pre_a = (e.getCrossSection())/distance;
    double pre_m = (e.getCrossSection())/distance * (1.0/vA + 1.0/vB);

    // diffusion of all the extracellularSubstances in A :
    for (Enumeration<Substance> substancesEnumeration =
nA.extracellularSubstances.elements(); substancesEnumeration.hasMoreElements();) {
        // for a given substance
        Substance sA = substancesEnumeration.nextElement();
        double sAConcentration = sA.getConcentration();
        // stop here if 1) non diffusible substance or 2) concentration very low:
        double diffusionConstant = sA.getDiffusionConstant();
        if(diffusionConstant<10E-14 ||
sAConcentration<Param.MINIMAL_CONCENTRATION_FOR_EXTRACELLULAR_DIFFUSION){
            continue; // to avoid a division by zero in the n/m if the diff const = 0;
        }
        // find the counterpart in B
        Substance sB = nB.getSubstanceInstance(sA);
        double sBConcentration = sB.getConcentration();
        // saving time : no diffusion if almost no difference;
        double absDiff = Math.abs(sAConcentration-sBConcentration);

        if( (absDiff<Param.MINIMAL_DIFFERENCE_CONCENTRATION_FOR_EXTRACELLULAR_DIFFU
SION) ||
(absDiff/sAConcentration<Param.MINIMAL_DC_OVER_C_FOR_EXTRACELLULAR_DIFFUSION))
        {
            continue;
        }
        // If we reach this point, it means that it is worth performing the diffusion.
        // we thus put ourselves on the list for performing it again next time step.
        nB.setOnTheSchedulerListForPhysicalNodes(true);
        this.onTheSchedulerListForPhysicalNodes = true;
    }
}

```

```

// Analytical computation of the diffusion between these two nodes
// (cf document "Diffusion" by F.Zubler for explanation).

double qA = sA.getQuantity();
double qB = sB.getQuantity();
double Tot = qA + qB;
double a = pre_a*diffusionConstant;
double m = pre_m*diffusionConstant;

double n = a*Tot/vB;
double nOverM = n/m;
double K = qA -nOverM;

qA = K*Math.exp(-m*Param.SIMULATION_TIME_STEP) + nOverM;
qB = Tot - qA;

sA.setQuantity(qA);
sB.setQuantity(qB);
// and update their concentration again
sA.updateConcentrationBasedOnQuantity(vA);
sB.updateConcentrationBasedOnQuantity(vB);
}
}

/** Modifies the quantity (increases or decreases) of an extra-cellular Substance.
 * If this <code>PhysicalNode</code> already has an <code>Substance</code> instance
 * corresponding to the type given as argument (with the same id), the fields
 * quantity and concentration in it will be modified, based on a computation depending
 * on the simulation time step and the space volume. If there is no such Substance
 * instance already, a new instance is requested from ECM.
 * <p>
 * This method is not used for diffusion, but only by biological classes...
 * @param id the name of the Substance to change.
 * @param quantityPerTime the rate of quantity production
 */
public void modifyExtracellularQuantity(String id, double quantityPerTime){

    Substance ss = extracellularSubstances.get(id);
    if(ss==null){
        ss = ecm.substanceInstance(id);
        extracellularSubstances.put(id, ss);
    }
    double deltaQ = quantityPerTime*Param.SIMULATION_TIME_STEP;
    double volume = soNode.getVolume();
    degradate(ecm.getECMtime()); // make sure you are up-to-date weight/ degradation
    ss.updateQuantityBasedOnConcentration(volume); // TODO : is this step really necessary ?
}

```

```

ss.changeQuantityFrom(deltaQ);
ss.updateConcentrationBasedOnQuantity(volume);
// we will diffuse next time step
onTheSchedulerListForPhysicalNodes = true;

```

```

}

```

%%%%%%%%%%%%%%%%%%%%%%%%%%%%%%%%%%%%%%%%%%%%%%%%%%%%%%%%%%%%%%%%%%%%%%%%%

SimpleMorphogeneSecretor.java:

```

public void run() {
    PhysicalObject po = cellElement.getPhysical();

    // 1) Probe the concentration

    double A = po.getConvolvedConcentration(substanceA);
    double H = po.getConvolvedConcentration(substanceH);

    // 2) Compute the modification of A and H based on GIERER &
    // MEINHARDT

    double dA_dt = RhoA*A*A / H + sigma_a;
    double dH_dt = RhoH*A*A + sigma_h;

    po.modifyExtracellularQuantity(substanceA, dA_dt*10);
    po.modifyExtracellularQuantity(substanceH, dH_dt*10);

}

```

%%%%%%%%%%%%%%%%%%%%%%%%%%%%%%%%%%%%%%%%%%%%%%%%%%%%%%%%%%%%%%%%%%%%%%%%%

ExtendedSuperpositionSecretor.java

```

public void run() {

    PhysicalObject po = cellElement.getPhysical();

    // 1) Probe the concentration

    double A = po.getConvolvedConcentration(substanceA);
    double H = po.getConvolvedConcentration(substanceH);

    double Aother = 0;

    for (int i = 0; i < otherActivators.size(); i++) {
        Aother += po.getExtracellularConcentration(otherActivators.get(i));
    }
}

```

```
// 2) Compute the modification of A and H based on GIERER &  
// MEINHARDT and competition with other activator substances
```

```
double dA_dt = RhoA * A * A / H + sigma_a - rep_coeff * Aother;  
double dH_dt = RhoH * A * A + sigma_h;
```

```
po.modifyExtracellularQuantity(substanceA, dA_dt * 10);  
po.modifyExtracellularQuantity(substanceH, dH_dt * 10);
```

```
}
```
